# Supplementary material
Source: PubMed Central journal article supplement (PMC5040678)
Supplement: ajtr0008-3802-f7.pdf [file ajtr0008-3802-f7.pdf]

## miR-561 inhibits gastric cancer via c-Myc

**Table S1.** Clinicopathologic characteristics of patients with GC

| Parameter          | Total samples | Percentage | miR-561 expression |           | P     |
|--------------------|---------------|------------|--------------------|-----------|-------|
|                    |               |            | Low (n%)           | High (n%) |       |
| Age (years)        |               |            |                    |           | 0.61  |
| ≥60                | 32            | 64%        | 28                 | 4         |       |
| <60                | 18            | 36%        | 16                 | 2         |       |
| Gender             |               |            |                    |           | 0.73  |
| Male               | 34            | 68%        | 30                 | 4         |       |
| Female             | 16            | 32%        | 14                 | 2         |       |
| Clinical TNM stage |               |            |                    |           |       |
| I                  | 10            | 20%        | 6                  | 4         |       |
| II                 | 18            | 36%        | 16                 | 2         |       |
| III                | 15            | 30%        | 15                 | 0         |       |
| IV                 | 7             | 14%        | 7                  | 0         |       |
| Location           |               |            |                    |           | 0.66  |
| Proximal           | 22            | 44%        | 20                 | 2         |       |
| Body               | 28            | 56%        | 24                 | 4         |       |
| Metastasis         |               |            |                    |           | 0.001 |
| Present            | 7             | 14%        | 7                  | 0         |       |
| Absent             | 43            | 86%        | 37                 | 6         |       |
| Histological       |               |            |                    |           |       |
| Diffuse            | 23            | 46%        | 21                 | 2         | 0.69  |
| Intestinal         | 27            | 54%        | 23                 | 4         |       |

**Table S2.** Primer sequence

| Name                              | Sequence (5'-3')                                   |
|-----------------------------------|----------------------------------------------------|
| miRNA reverse transcription prime |                                                    |
| miRNA-561                         | GTATCCAGGTCTGCAGGGTCCGAGGTATACTGGATCGCTACGACTCACAT |
| U6 snRNA                          | AAAATATGGAACGCTTCACGAATTG                          |
| Real-time PCR primer sequence     |                                                    |
| miRNA-561                         | CAAAGUUUAAGAUCUUUGAAGU<br>TCAACTGGTGTCTGGAGTCGGC   |
| U6 snRNA                          | CTCGCTTCGGCAGCACATATACT<br>ACGCTTCACGAATTTGCGTGTC  |
| GAPDH                             | AATGGGCAGCCGTTAGGAAA<br>TGAAGGGGTCATTGATGGCA       |
| c-Myc                             | TGCTAAGAAGATTGGTCTGTA<br>GCGAAGGGCTGAGACATTAC      |
